# Supplementary material for: Preparation, characterization, and evaluation of the co-amorphous systems of dasatinib to improve its pharmaceutical attributes
Source: Royal Society of Chemistry journal article supplement (doi:10.1039/d5ce00064e), 2025-01-01
Supplement: d5ce00064e1.pdf [file d5ce00064e1.pdf]

## **Preparation, Characterization, and Evaluation of the Co-amorphous System of Dasatinib to Improve its Pharmaceutical Attributes**

Rahul B Chavan,<sup>1</sup> Shovik Ray<sup>2</sup>, Pritam Kundu,<sup>1,4</sup> Sai Adishesu Dupakuntla,<sup>1</sup> Sanjeev Giri,<sup>1</sup> Ponnusankar Sivasankaran,<sup>4</sup> \* Gowthamarajan Kuppusamy,<sup>3</sup> Sheetal Kumar Jain<sup>2</sup>, Ranadeep Bokali<sup>1,\*</sup>

<sup>1</sup>Aurigene Oncology Limited, Bengaluru, Karnataka 560100

<sup>2</sup>Solid State and Structural Chemistry Unit, Indian Institute of Science, Bangalore, Karnataka, India

<sup>3</sup>Department of Pharmaceutics, JSS College of Pharmacy, JSS Academy of Higher Education & Research, Ooty, The Nilgiris, Tamil Nadu, India

<sup>4</sup>Department of Pharmacy Practice, JSS College of Pharmacy, JSS Academy of Higher Education & Research, Ooty, The Nilgiris, Tamil Nadu, India

**\* Corresponding author.** Rahul B Chavan, Ranadeep Bokali & Ponnusankar Sivasankaran

**Tel.** + 918071025444

**Fax.** +918028526285

**E-mail:** [Rahul\\_C@aurigene.com](mailto:Rahul_C@aurigene.com)

**Address:** Pharmaceutical Development, Aurigene Oncology Limited, 39-40 Hosur Road

KIADB Industrial Area, Joggers Ln, Phase 2, Electronic City, Bengaluru, Karnataka 560100

## Supporting document

### Tables

**Table S1** Gradient details

| <b>Time</b> | <b>Mobile Phase A: 0.1 % Trifluoro acetic acid in water</b> | <b>Mobile Phase B: Acetonitrile</b> |
|-------------|-------------------------------------------------------------|-------------------------------------|
| 0           | 5                                                           | 95                                  |
| 1           | 5                                                           | 95                                  |
| 6           | 100                                                         | 0                                   |
| 8           | 100                                                         | 0                                   |
| 10          | 5                                                           | 95                                  |
| 12          | 5                                                           | 95                                  |

**Table S2** Outcome of coformers screening study by PXRD study

| <b>Sr. No.</b> | <b>Co-Former Name</b> | <b>PXRD results</b>   |
|----------------|-----------------------|-----------------------|
| 1              | Cinnamic Acid         | Amorphous             |
| 2              | Sebacic Acid          | Amorphous             |
| 3              | Ferulic Acid          | Amorphous             |
| 4              | Nicotinic Acid        | Partially crystalline |
| 5              | Malic Acid            | Amorphous             |
| 6              | Succinic Acid         | Amorphous             |
| 7              | Citric Acid           | Amorphous             |
| 8              | Fumaric Acid          | Amorphous             |
| 9              | Gentisic Acid         | Amorphous             |
| 10             | Vanillic Acid         | Amorphous             |
| 11             | Phenanthrene          | Partially crystalline |

**Table S3** The pKa values of the cofomers used.

| Entry | Name of the cofomers | pKa <sub>1</sub><br>(at 25 °C) | pKa <sub>2</sub><br>(at 25 °C) | pKa <sub>3</sub><br>(at 25 °C) | pKa (total)<br>(at 25 °C) |
|-------|----------------------|--------------------------------|--------------------------------|--------------------------------|---------------------------|
| 1     | Sebacic Acid         | 4.40                           | 5.22                           | —                              | 9.62                      |
| 2     | Citric Acid          | 2.63                           | 4.11                           | 5.34                           | 12.08                     |
| 3     | Fumaric Acid         | 3.03                           | 4.54                           | —                              | 7.57                      |
| 4     | Malic Acid           | 2.77                           | 4.44                           | —                              | 7.21                      |
| 5     | Succinic Acid        | 3.98                           | 5.2                            | —                              | 9.18                      |
| 6     | Cinnamic Acid        | 4.45                           | —                              | —                              | 4.45                      |
| 7     | Gentisic Acid        | 2.95                           | —                              | —                              | 2.95                      |
| 8     | Ferulic Acid         | 4.58                           | 9.39                           | —                              | 13.97                     |
| 9     | Vanillic Acid        | 4.47                           | 9.39                           | —                              | 13.86                     |

**Table S4** pH of solubility samples

| Cofomer       | pH of solubility samples |
|---------------|--------------------------|
| Sebacic Acid  | 2.5                      |
| Citric Acid   | 2.1                      |
| Fumaric Acid  | 2.2                      |
| Malic Acid    | 2.0                      |
| Succinic Acid | 2.2                      |
| Cinnamic Acid | 2.9                      |
| Gentisic Acid | 3.0                      |
| Ferulic Acid  | 2.8                      |
| Vanillic Acid | 2.8                      |

**Table S5** Dissolution parameters

| Dissolution parameter | DAS  | DAS:SU | DAS:MAL | DAS:SU PM | DAS:MAL PM |
|-----------------------|------|--------|---------|-----------|------------|
| DE <sub>15</sub> (%)  | 3.48 | 38.6   | 23.55   | 2.46      | 3.87       |
| F <sub>2</sub>        | -    | 18.41  | 20.24   | 80.98     | 79.34      |

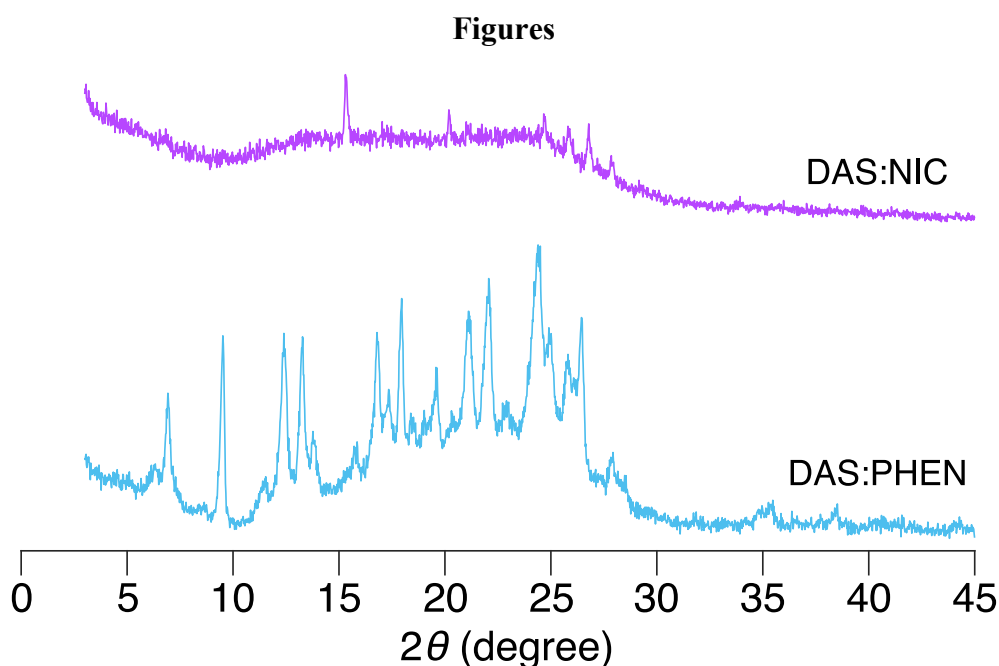

**Figure S1.** PXRD patterns of DAS:PHEN and DAS:NIC showing manifestation of their crystallinity in co-amorphous system.

Figure S2 shows the FTIR spectra of DAS, succinic acid (SU), malic acid (MAL), co-amorphous systems DAS: MAL and DAS: SU. The FTIR spectrum of DAS, SU and MAL shows prominent vibration bands at  $3458\text{ cm}^{-1}$  (N-H stretch),  $3205\text{ cm}^{-1}$  (O-H stretch),  $2956\text{ cm}^{-1}$  (methyl C-H stretch), and  $1681$  (low intensity) and  $1610$  (high intensity)  $\text{cm}^{-1}$  (C=O stretch). Further moving to DAS: SU or DAS:MAL co-amorphous system, both the fingerprint region and functional group region appears to be broader. Consequently, it becomes very hard to track the shifts in those characteristic peaks, if present. Therefore, FTIR does not provide any conclusive idea of molecular interactions. As a result, advanced solid state NMR experiments were employed to investigate the inter- as well as intra-molecular interactions.

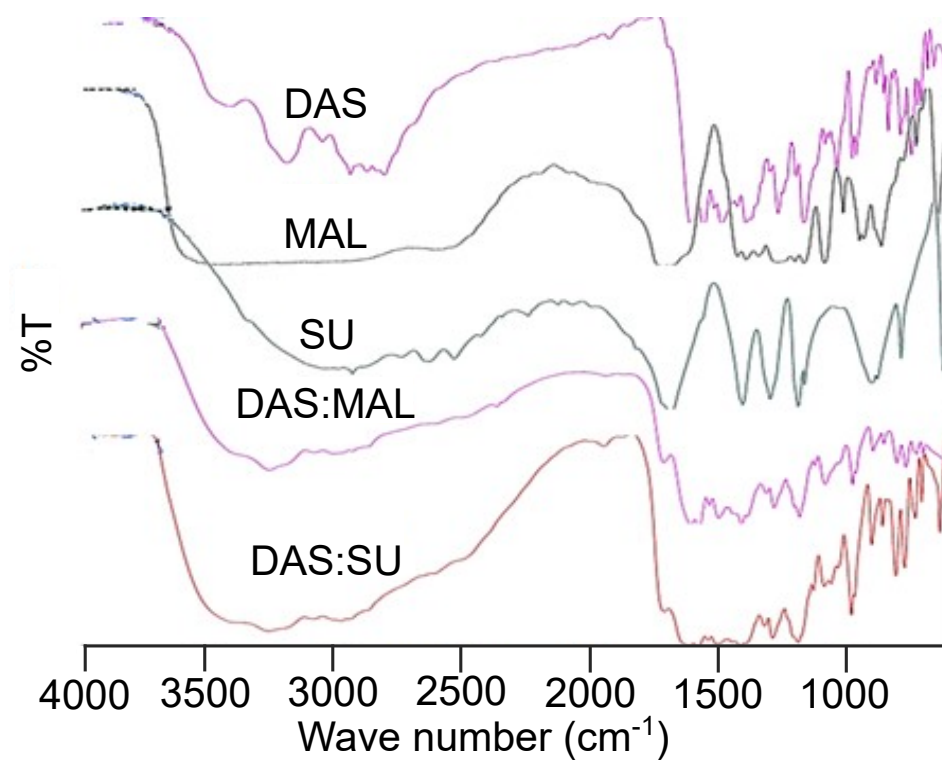

**Figure S2.** FTIR data of DAS, MAL and SU along with the co-amorphous system of DAS:MAL and DAS:SU.

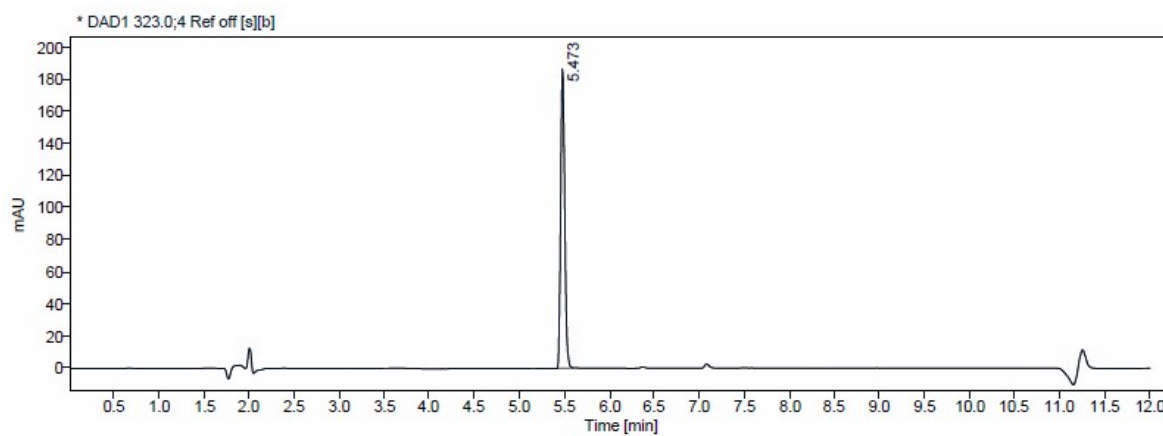

**Figure S3** Representative chromatograms of Dasatinib

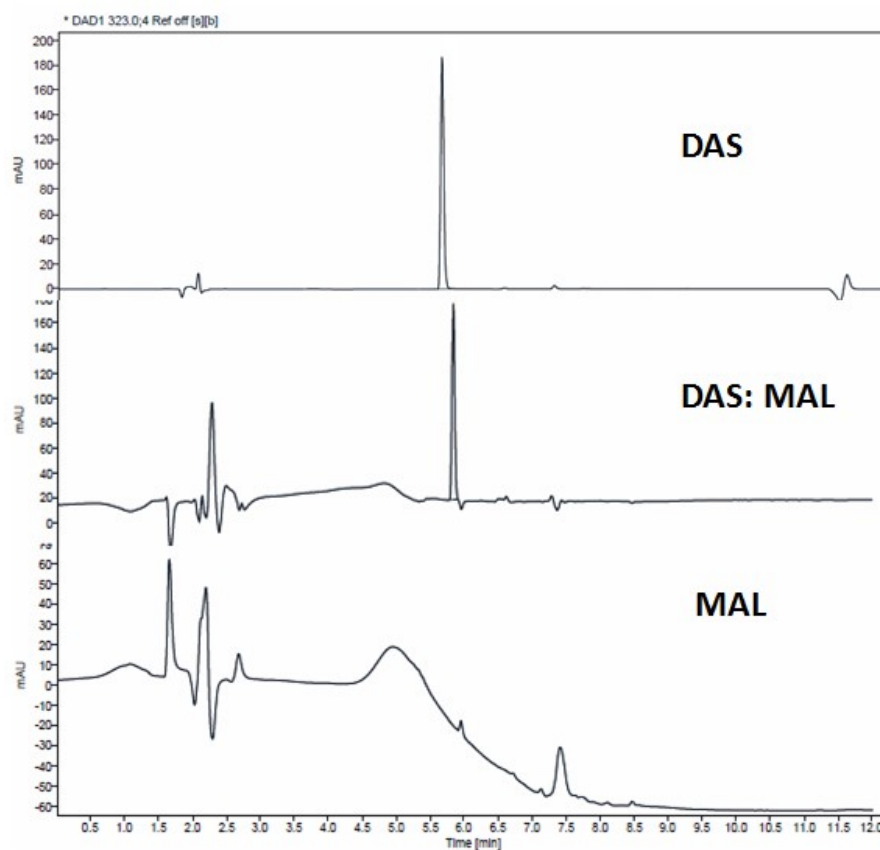

**Figure S4** Overlay of chromatogram of DAS, MAL & DAS:MAL

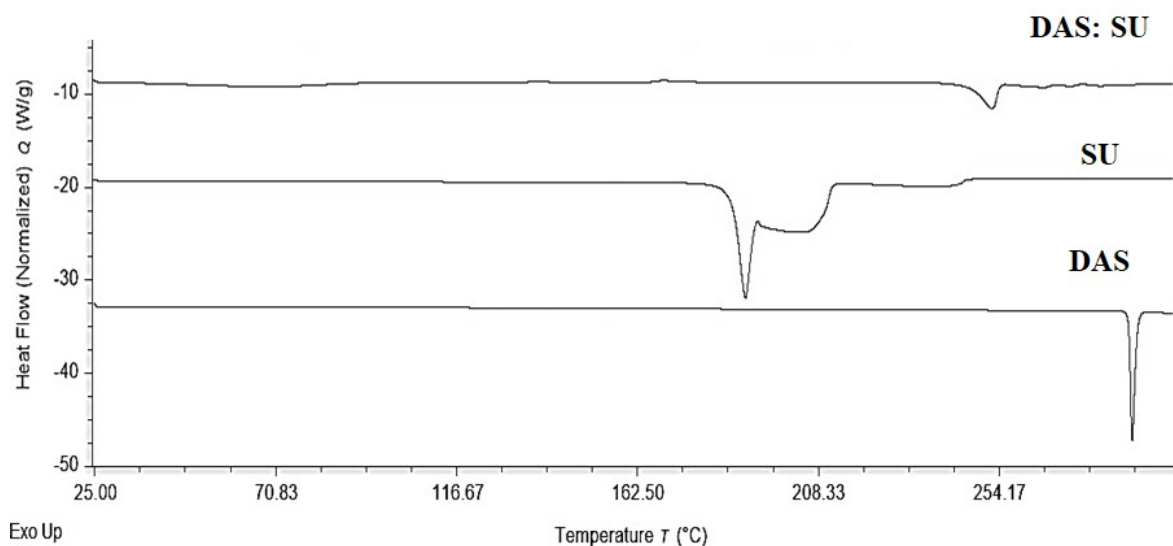

**Figure S5** DSC overlay of DAS, SU and DAS:SU coamorphous system

### Qualitative solubility study

To find the suitable solvent for the liquid-assisted grinding method, the qualitative solubility of API and coformers in various solvents (methanol, ethanol, acetonitrile, and iso-propyl

alcohol) were performed. One mg of API or coformers were added in centrifuge tube followed by addition of 10  $\mu$ L of the solvent. If the API or coformers were not dissolved again, add 10 mL of liquids to each centrifugal tube until API or coformer dissolved completely. Calculate the amount of solvent required to dissolve 1 mg of API or coformer. Among selected solvents, solubility of API and coformers follow the order from highly solubilizing to poorly solubilizing solvents methanol > ethanol > iso-propyl alcohol > acetonitrile). Based on qualitative solubility study, methanol selected for coformer screening study.
